# Supplementary material
Source: Springer Nature journal article supplement (https://www.springermedizin.de/resource/supplementary/13027_2009_161_MOESM4_ESM.pdf/25656558)

SV40

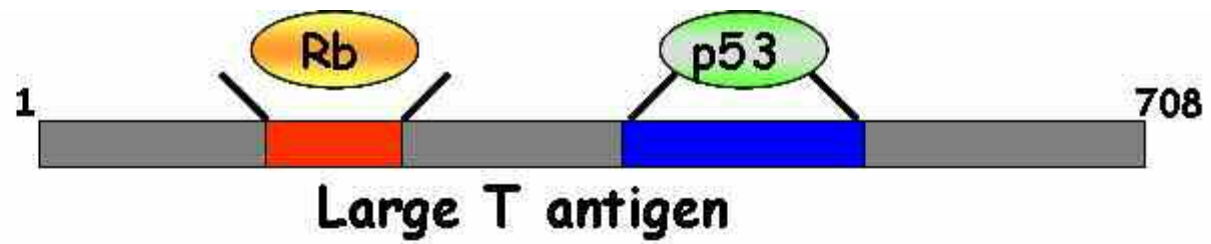

Adenovirus

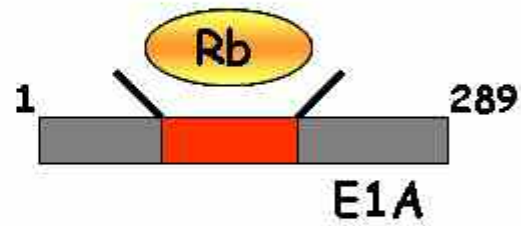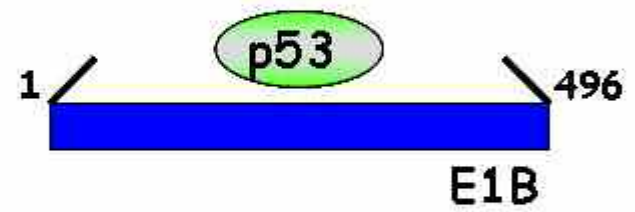

HPV

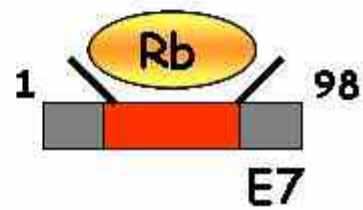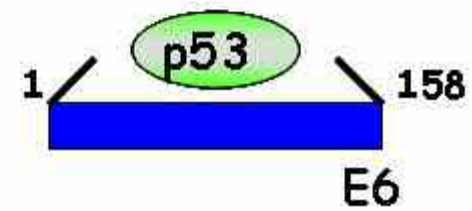

Supplement: MOESM4 [file 25656558]
